# Supplementary material for: Influence of the Production System (Intensive vs. Extensive) at Farm Level on Proximate Composition and Volatile Compounds of Portuguese Lamb Meat
Source: MDPI journal article supplement (doi:10.3390/foods10071450), 2021-06-22
Supplement: s1 [file s1]

**Supplementary Table S1:** Chemical composition, ingredients and amounts of mineral and vitamin mix used in the diet of intensively-reared lambs.

| Nutrient                        | Commercial compound feed |
|---------------------------------|--------------------------|
| <i>Chemical composition (%)</i> |                          |
| Protein                         | 15.5                     |
| Ash                             | 8.2                      |
| Fat                             | 4.5                      |
| Fibre                           | 8.2                      |
| Calcium                         | 1.10                     |
| Phosphorous                     | 0.4                      |
| Sodium                          | 0.37                     |
| <i>Mineral Mix</i>              |                          |
| Fe (mg/kg)                      | 20                       |
| Co (mg/kg)                      | 0.4                      |
| Mg (mg/kg)                      | 62                       |
| Zn (mg/kg)                      | 110                      |
| Se (mg/kg)                      | 0.1                      |
| I (mg/kg)                       | 0.6                      |
| Cu (mg/kg)                      | 5                        |
| <i>Vitamin mix</i>              |                          |
| Vitamin A (UI/kg)               | 8000                     |
| Vitamin D3 (UI/kg)              | 700                      |
| Vitamin E (mg/kg)               | 25                       |

Commercial compound ingredients (in unknown proportions): Barley, wheat bran, extruded dehulled soy meal, dry beet pulp, brewers' dried grains, soy hulls, beet molasses, wheat germ, calcium carbonate, sunflower seed meal (extracted), soy oil, and sodium chloride.
